# Supplementary material
Source: publisher site journal article supplement (https://www.spandidos-publications.com/6917/downloadSupplementary)

Figure S1. Representative *EGFR* mutation spectra using MassARRAY® MULTI-TOF nucleotide mass spectrometry system. (A) *EGFR* L858R, (B) *EGFR* T790M, (C) *EGFR* exon 19 deletion and (D) *EGFR* G719S. Mass was expressed in Da (Dalton). Leu, leucine; Arg, arginine; Thr, threonine; Met, methionine; Glu, glutamine; Ala, alanine; Gly, glycine; Ser, serine; UEP, unextended probe; M, mutation signal; W, wild-type signal; del, deletion; *EGFR*, epidermal growth factor receptor.

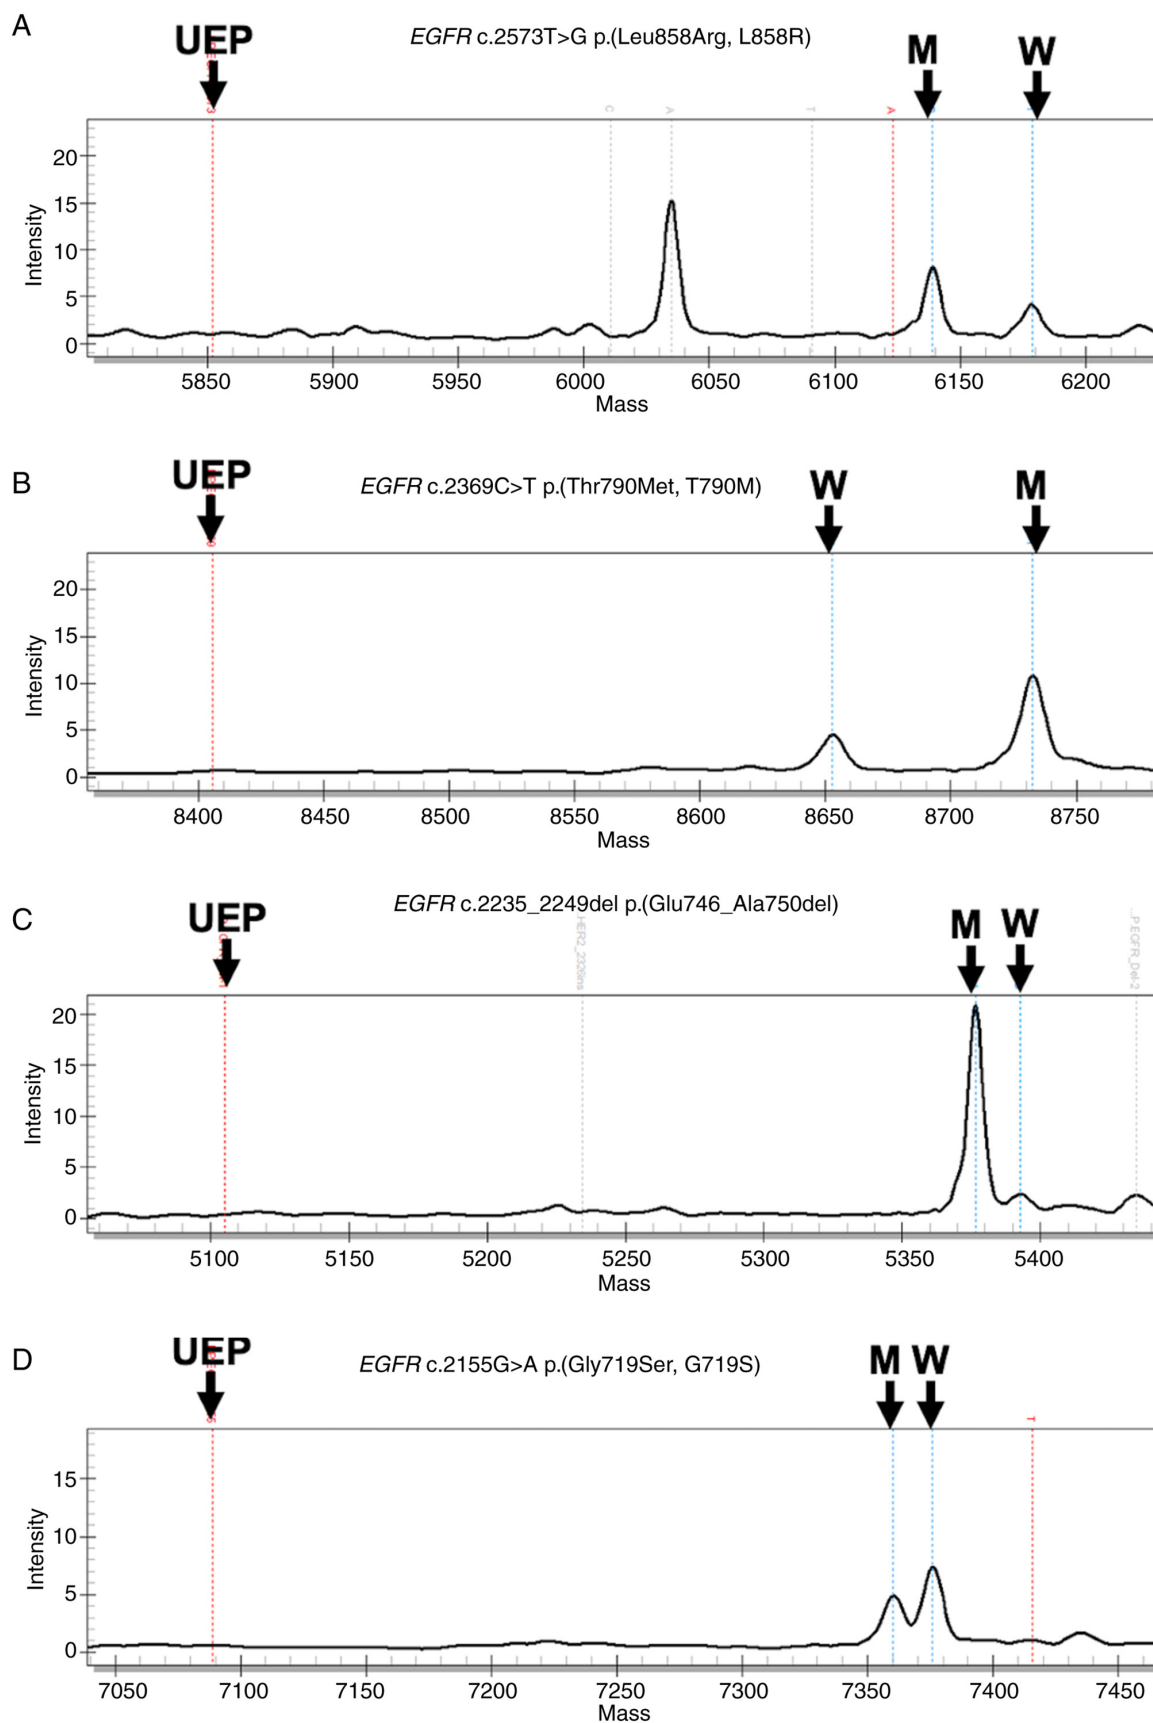

Figure S2. Representative microscopy images. (A) A representative immunohistochemistry image of a positive *anaplastic lymphoma kinase* fusion and (B) a representative fluorescent *in situ* hybridization image of a positive *ROS proto-oncogene 1* fusion.

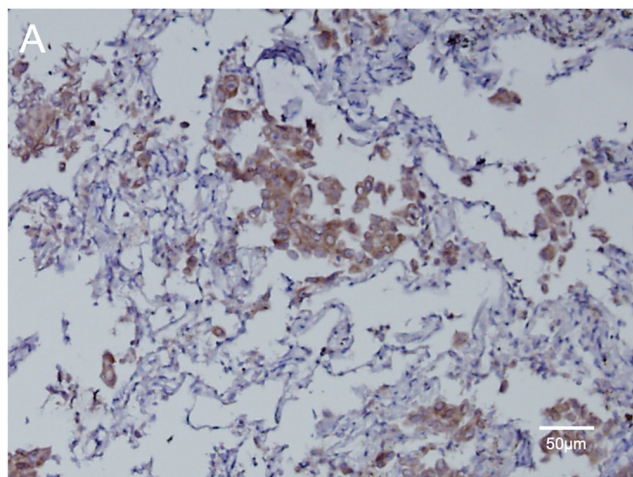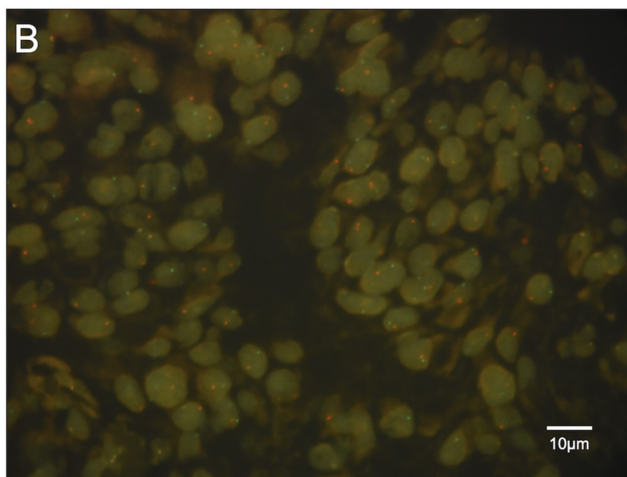

Supplement: Supplementary file 1 [file downloadSupplementary]
